# Supplementary material
Source: HighWire-hosted journal article supplement (https://www.cmaj.ca/highwire/filestream/75396/field_highwire_adjunct_files/0/20-0528_review_visual_sum_FINAL.pdf)
Supplement: 20-0528_review_visual_sum_FINAL.pdf [file 20-0528_review_visual_sum_FINAL.pdf]

# POTENTIAL HARMS OF CHLOROQUINE OR HYDROXYCHLOROQUINE

for management of SARS-CoV-2 infection

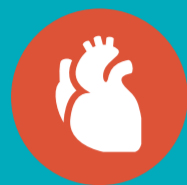

**Cardiac arrhythmias**

especially when coprescribed with other QTc-prolonging drugs such as azithromycin

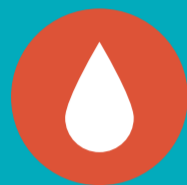

**Hypoglycemia**

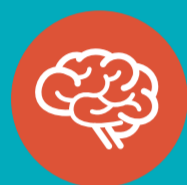

**Neuropsychiatric effects**

including confusion, agitation, paranoia, hallucinations, psychosis

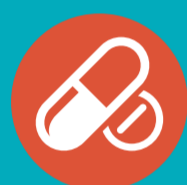

**Drug-drug interactions**

increased effect of some drugs (e.g., metoprolol) and decreased effect of others (e.g., codeine, tramadol)

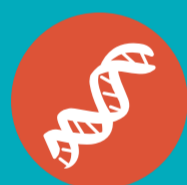

**Genetic variability**

in metabolism influences safety and effectiveness

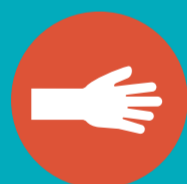

**Severe cutaneous reactions**

rare but reported

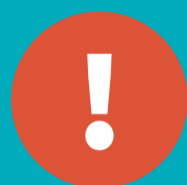

**Extremely toxic in overdose**

We need better-designed studies to determine the benefit of these drugs, if any, in treating or preventing COVID-19.

Source: Juurlink DN. Safety considerations with chloroquine, hydroxychloroquine and azithromycin in the management of SARS-CoV-2 infection. *CMAJ* 2020. doi: 10.1503/cmaj.200528; early-released April 8, 2020.

©2020 Joule Inc. or its licensors

**cmaj**
